# Supplementary material
Source: publisher figshare collection journal article supplement (https://acs.figshare.com/ndownloader/files/4004512)
Supplement: Supplementary file 1 [file 4004512]

# Clickable Glycopeptoids for Synthesis of Glycopeptide Mimic

Anadi Singhamahapatra,\* Laxminarayan Sahoo and Duraikkannu Loganathan<sup>□</sup>

Department of Chemistry, Indian Institute of Technology Madras, Chennai – 600036, India

Email: [singhaindia@gmail.com](mailto:singhaindia@gmail.com)

August 2013

- 
- Correspondence: Anadi Singhamahapatra, Department of Chemistry, Indian Institute of Technology Madras, Chennai – 600036, India; Tel.: +91-44-22575221, +91-9884242732; Fax: 091-44-22570509; E-mail: [singhaindia@gmail.com](mailto:singhaindia@gmail.com)

<sup>□</sup> Deceased on 9th February, 2013

## Contents

|                   |                                                                             |     |
|-------------------|-----------------------------------------------------------------------------|-----|
| <b>Figure S1</b>  | $^1\text{H}$ NMR (400 MHz, $\text{CDCl}_3$ ) of compound <b>5</b> .....     | S5  |
| <b>Figure S2</b>  | $^{13}\text{C}$ NMR (100 MHz, $\text{CDCl}_3$ ) of compound <b>5</b> .....  | S5  |
| <b>Figure S3</b>  | $^1\text{H}$ NMR (400 MHz, $\text{CDCl}_3$ ) of compound <b>6</b> .....     | S6  |
| <b>Figure S4</b>  | $^{13}\text{C}$ NMR (100 MHz, $\text{CDCl}_3$ ) of compound <b>6</b> .....  | S6  |
| <b>Figure S5</b>  | $^1\text{H}$ NMR (400 MHz, $\text{CDCl}_3$ ) of compound <b>7</b> .....     | S7  |
| <b>Figure S6</b>  | $^{13}\text{C}$ NMR (100 MHz, $\text{CDCl}_3$ ) of compound <b>7</b> .....  | S7  |
| <b>Figure S7</b>  | $^1\text{H}$ NMR (400 MHz, $\text{CDCl}_3$ ) of compound <b>8</b> .....     | S8  |
| <b>Figure S8</b>  | $^{13}\text{C}$ NMR (100 MHz, $\text{CDCl}_3$ ) of compound <b>8</b> .....  | S8  |
| <b>Figure S9</b>  | $^1\text{H}$ NMR (400 MHz, $\text{CDCl}_3$ ) of compound <b>1a</b> .....    | S9  |
| <b>Figure S10</b> | $^{13}\text{C}$ NMR (100 MHz, $\text{CDCl}_3$ ) of compound <b>1a</b> ..... | S9  |
| <b>Figure S11</b> | $^1\text{H}$ NMR (400 MHz, $\text{CDCl}_3$ ) of compound <b>1b</b> .....    | S10 |
| <b>Figure S12</b> | $^{13}\text{C}$ NMR (100 MHz, $\text{CDCl}_3$ ) of compound <b>1b</b> ..... | S10 |
| <b>Figure S13</b> | $^1\text{H}$ NMR (400 MHz, $\text{CDCl}_3$ ) of compound <b>1c</b> .....    | S11 |
| <b>Figure S14</b> | $^{13}\text{C}$ NMR (100 MHz, $\text{CDCl}_3$ ) of compound <b>1c</b> ..... | S11 |
| <b>Figure S15</b> | $^1\text{H}$ NMR (400 MHz, $\text{CDCl}_3$ ) of compound <b>2a</b> .....    | S12 |
| <b>Figure S16</b> | $^{13}\text{C}$ NMR (100 MHz, $\text{CDCl}_3$ ) of compound <b>2a</b> ..... | S12 |
| <b>Figure S17</b> | $^1\text{H}$ NMR (400 MHz, $\text{CDCl}_3$ ) of compound <b>2b</b> .....    | S13 |
| <b>Figure S18</b> | $^{13}\text{C}$ NMR (100 MHz, $\text{CDCl}_3$ ) of compound <b>2b</b> ..... | S13 |
| <b>Figure S19</b> | $^1\text{H}$ NMR (400 MHz, $\text{CDCl}_3$ ) of compound <b>2c</b> .....    | S14 |
| <b>Figure S20</b> | $^{13}\text{C}$ NMR (100 MHz, $\text{CDCl}_3$ ) of compound <b>2c</b> ..... | S14 |

|                   |                                                                             |            |
|-------------------|-----------------------------------------------------------------------------|------------|
| <b>Figure S21</b> | $^1\text{H}$ NMR (400 MHz, $\text{CDCl}_3$ ) of compound <b>3a</b> .....    | <b>S15</b> |
| <b>Figure S22</b> | $^{13}\text{C}$ NMR (100 MHz, $\text{CDCl}_3$ ) of compound <b>3a</b> ..... | <b>S15</b> |
| <b>Figure S23</b> | $^1\text{H}$ NMR (400 MHz, $\text{CDCl}_3$ ) of compound <b>3b</b> .....    | <b>S16</b> |
| <b>Figure S24</b> | $^{13}\text{C}$ NMR (100 MHz, $\text{CDCl}_3$ ) of compound <b>3b</b> ..... | <b>S16</b> |
| <b>Figure S25</b> | $^1\text{H}$ NMR (400 MHz, $\text{CDCl}_3$ ) of compound <b>3c</b> .....    | <b>S17</b> |
| <b>Figure S26</b> | $^{13}\text{C}$ NMR (100 MHz, $\text{CDCl}_3$ ) of compound <b>3c</b> ..... | <b>S17</b> |
| <b>Figure S27</b> | $^1\text{H}$ NMR (400 MHz, $\text{CDCl}_3$ ) of compound <b>4a</b> .....    | <b>S18</b> |
| <b>Figure S28</b> | $^{13}\text{C}$ NMR (100 MHz, $\text{CDCl}_3$ ) of compound <b>4a</b> ..... | <b>S18</b> |
| <b>Figure S29</b> | $^1\text{H}$ NMR (400 MHz, $\text{CDCl}_3$ ) of compound <b>4b</b> .....    | <b>S19</b> |
| <b>Figure S30</b> | $^{13}\text{C}$ NMR (100 MHz, $\text{CDCl}_3$ ) of compound <b>4b</b> ..... | <b>S19</b> |
| <b>Figure S31</b> | $^1\text{H}$ NMR (400 MHz, $\text{CDCl}_3$ ) of compound <b>4c</b> .....    | <b>S20</b> |
| <b>Figure S32</b> | $^{13}\text{C}$ NMR (100 MHz, $\text{CDCl}_3$ ) of compound <b>4c</b> ..... | <b>S20</b> |
| <b>Figure S33</b> | $^1\text{H}$ NMR (400 MHz, $\text{CDCl}_3$ ) of compound <b>1d</b> .....    | <b>S21</b> |
| <b>Figure S34</b> | $^{13}\text{C}$ NMR (100 MHz, $\text{CDCl}_3$ ) of compound <b>1d</b> ..... | <b>S21</b> |
| <b>Figure S35</b> | $^1\text{H}$ NMR (400 MHz, $\text{CDCl}_3$ ) of compound <b>10</b> .....    | <b>S22</b> |
| <b>Figure S36</b> | $^{13}\text{C}$ NMR (100 MHz, $\text{CDCl}_3$ ) of compound <b>10</b> ..... | <b>S22</b> |
| <b>Figure S37</b> | $^1\text{H}$ NMR (400 MHz, $\text{CDCl}_3$ ) of compound <b>13</b> .....    | <b>S23</b> |
| <b>Figure S38</b> | $^{13}\text{C}$ NMR (100 MHz, $\text{CDCl}_3$ ) of compound <b>13</b> ..... | <b>S23</b> |
| <b>Figure S39</b> | $^1\text{H}$ NMR (400 MHz, $\text{CDCl}_3$ ) of compound <b>17</b> .....    | <b>S24</b> |
| <b>Figure S40</b> | $^{13}\text{C}$ NMR (100 MHz, $\text{CDCl}_3$ ) of compound <b>17</b> ..... | <b>S24</b> |
| <b>Figure S41</b> | $^1\text{H}$ NMR (400 MHz, $\text{CDCl}_3$ ) of compound <b>14</b> .....    | <b>S25</b> |

|                   |                                                                             |            |
|-------------------|-----------------------------------------------------------------------------|------------|
| <b>Figure S42</b> | $^{13}\text{C}$ NMR (100 MHz, $\text{CDCl}_3$ ) of compound <b>14</b> ..... | <b>S25</b> |
| <b>Figure S43</b> | $^1\text{H}$ NMR (400 MHz, $\text{CDCl}_3$ ) of compound <b>20</b> .....    | <b>S26</b> |
| <b>Figure S44</b> | $^{13}\text{C}$ NMR (100 MHz, $\text{CDCl}_3$ ) of compound <b>20</b> ..... | <b>S26</b> |

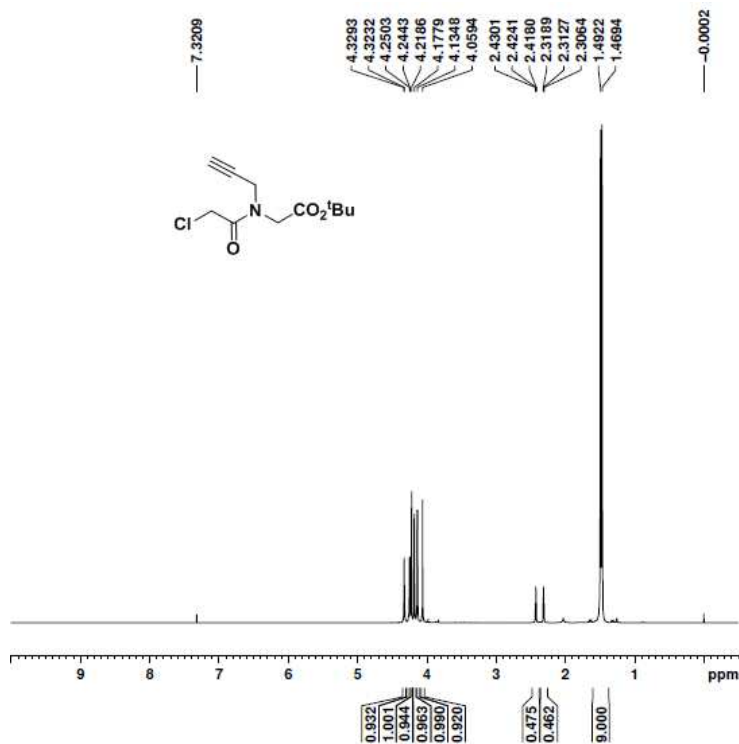

**Figure S1** <sup>1</sup>H NMR (400 MHz, CDCl<sub>3</sub>) of compound **5**

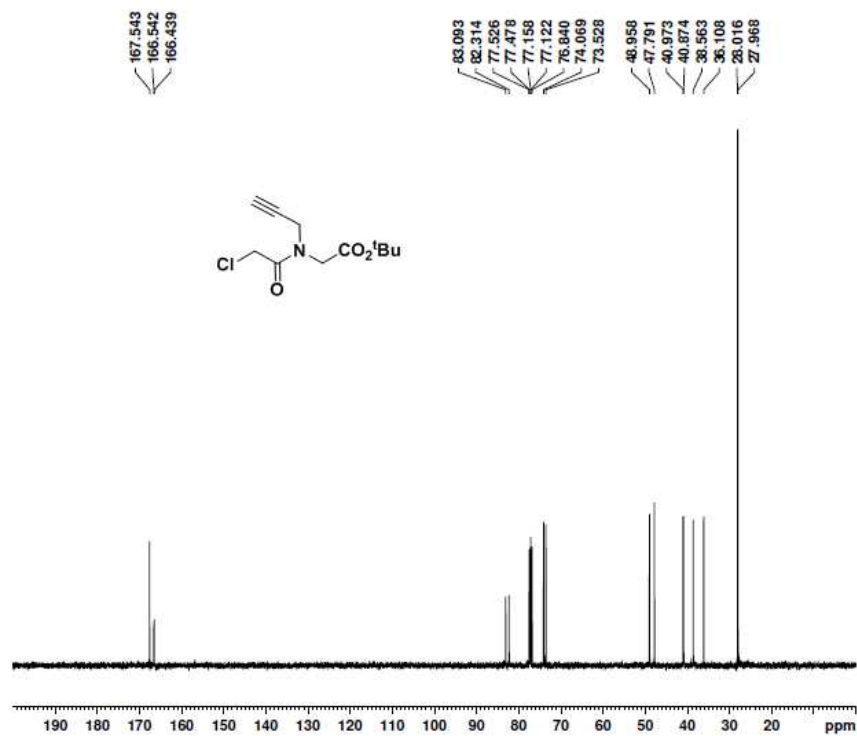

**Figure S2** <sup>13</sup>C NMR (100 MHz, CDCl<sub>3</sub>) of compound **5**

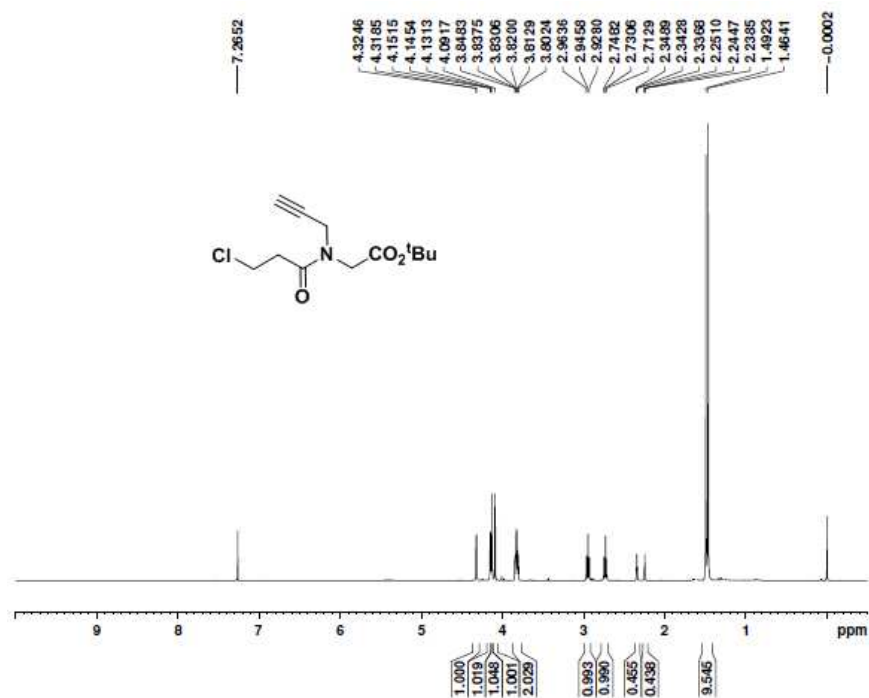

Figure S3 <sup>1</sup>H NMR (400 MHz, CDCl<sub>3</sub>) of compound 6

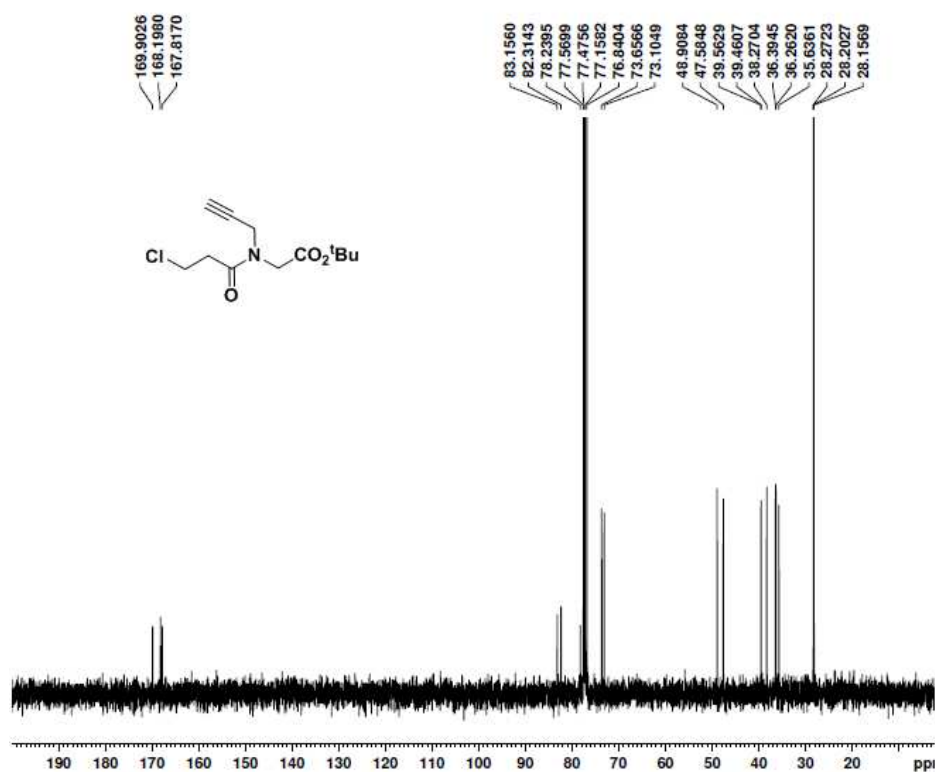

Figure S4 <sup>13</sup>C NMR (100 MHz, CDCl<sub>3</sub>) of compound 6

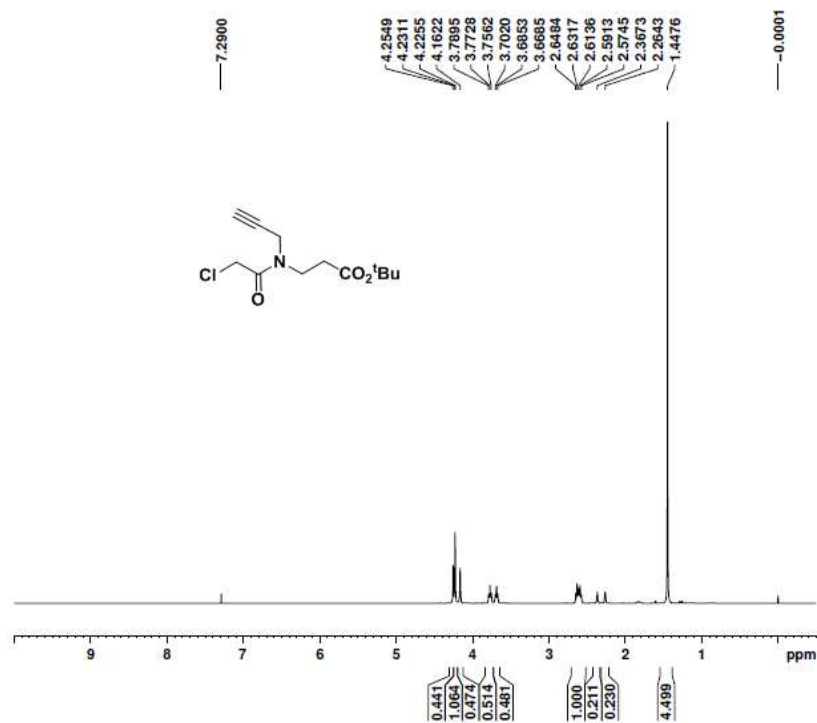

Figure S5 <sup>1</sup>H NMR (400 MHz, CDCl<sub>3</sub>) of compound 7

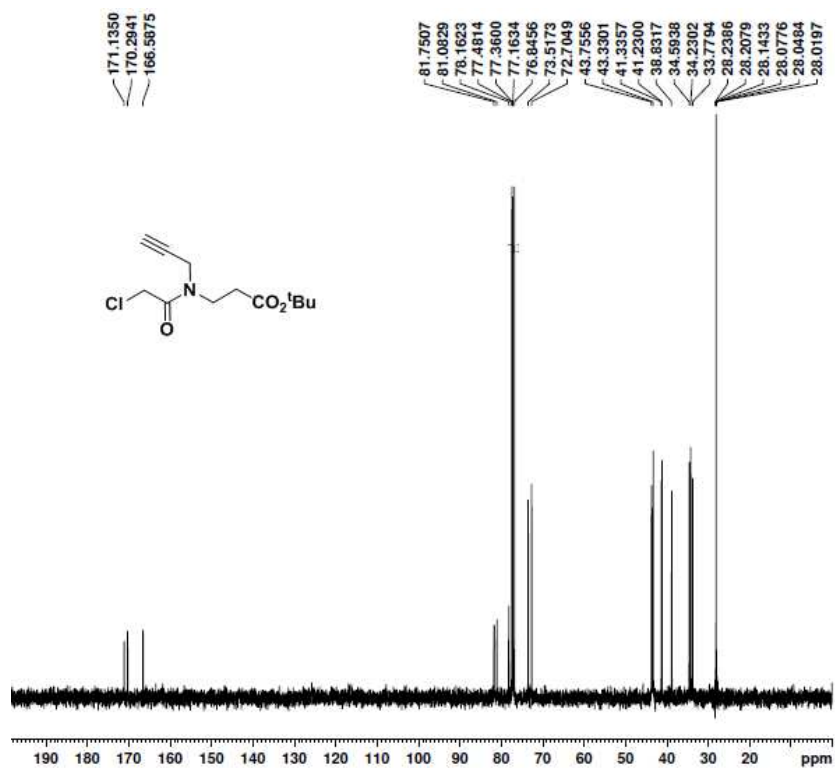

Figure S6 <sup>13</sup>C NMR (100 MHz, CDCl<sub>3</sub>) of compound 7

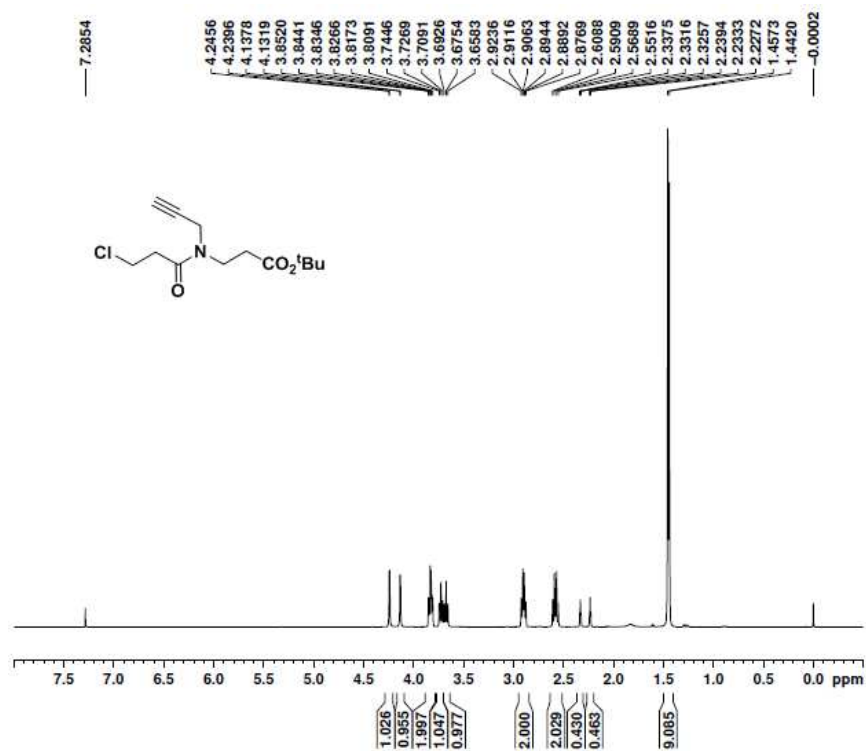

Figure S7 <sup>1</sup>H NMR (400 MHz, CDCl<sub>3</sub>) of compound 8

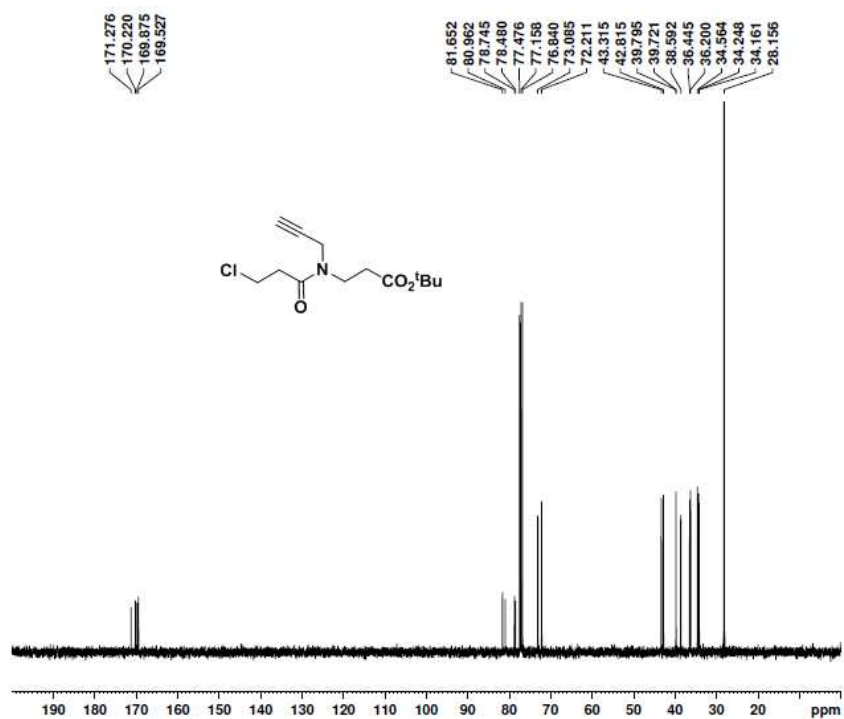

Figure S8 <sup>13</sup>C NMR (100 MHz, CDCl<sub>3</sub>) of compound 8



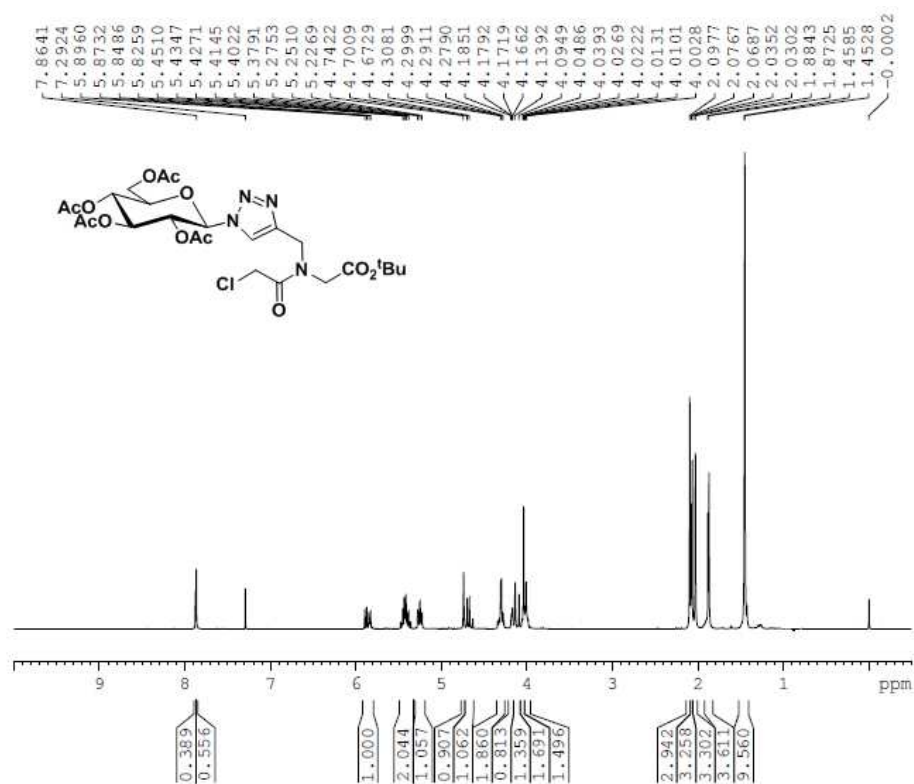

Figure S9  $^1\text{H}$  NMR (400 MHz,  $\text{CDCl}_3$ ) of compound **1a**

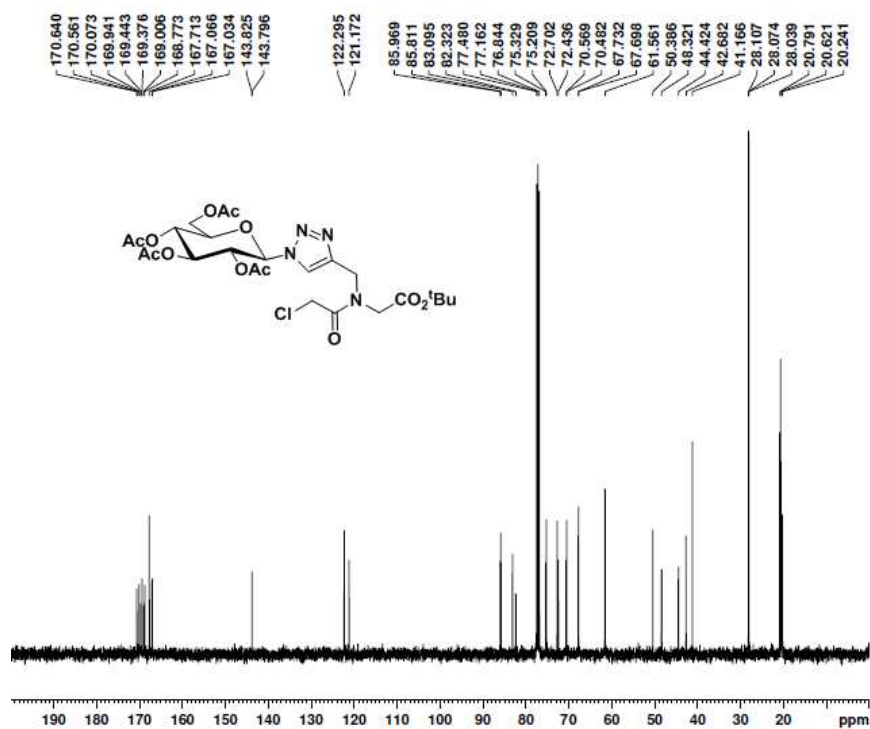

Figure S10  $^{13}\text{C}$  NMR (100 MHz,  $\text{CDCl}_3$ ) of compound **1a**



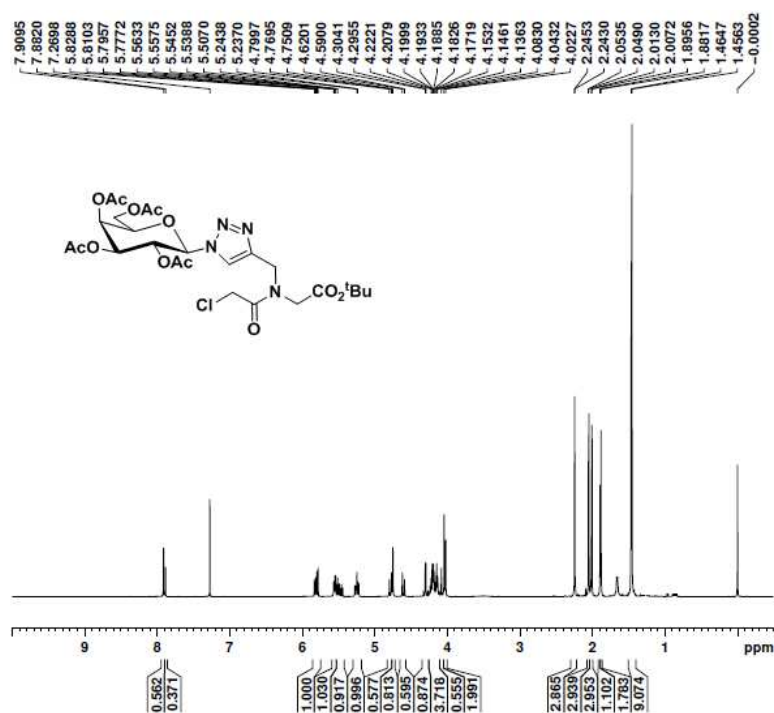

Figure S13 <sup>1</sup>H NMR (400 MHz, CDCl<sub>3</sub>) of compound **1c**

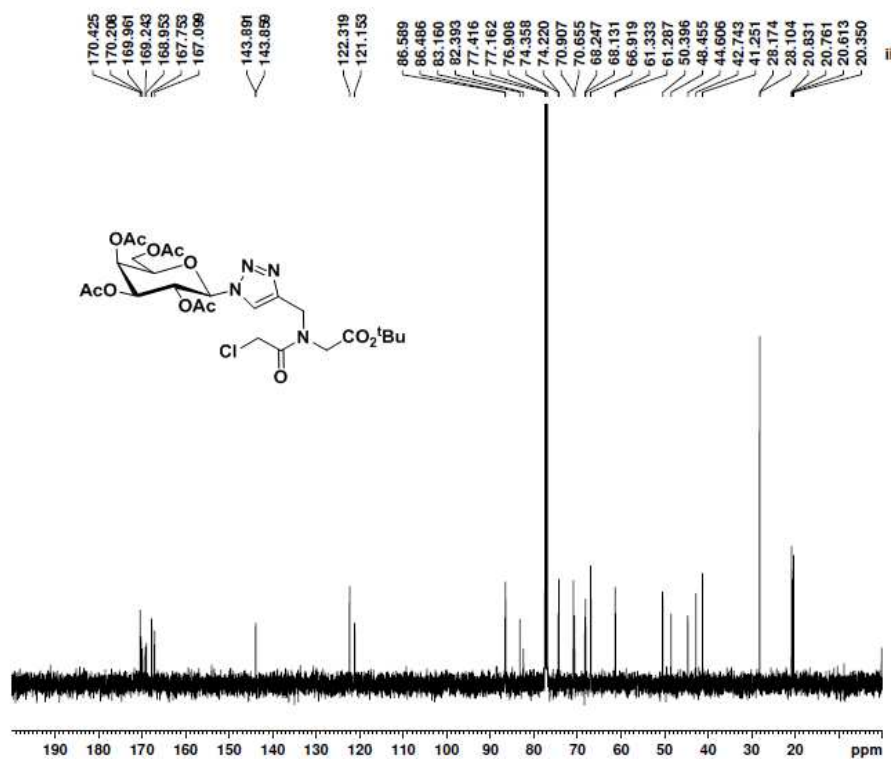

Figure S14 <sup>13</sup>C NMR (100 MHz, CDCl<sub>3</sub>) of compound **1c**

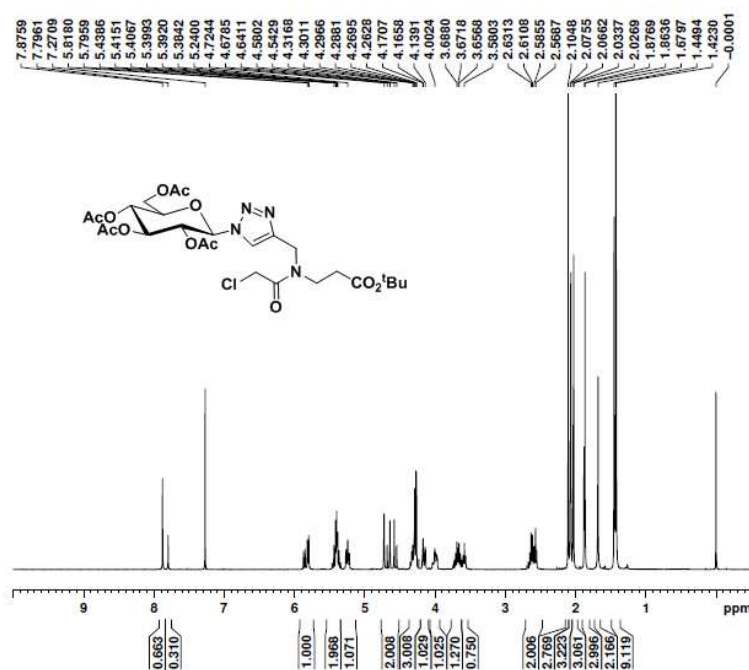

Figure S15 <sup>1</sup>H NMR (400 MHz, CDCl<sub>3</sub>) of compound 2a

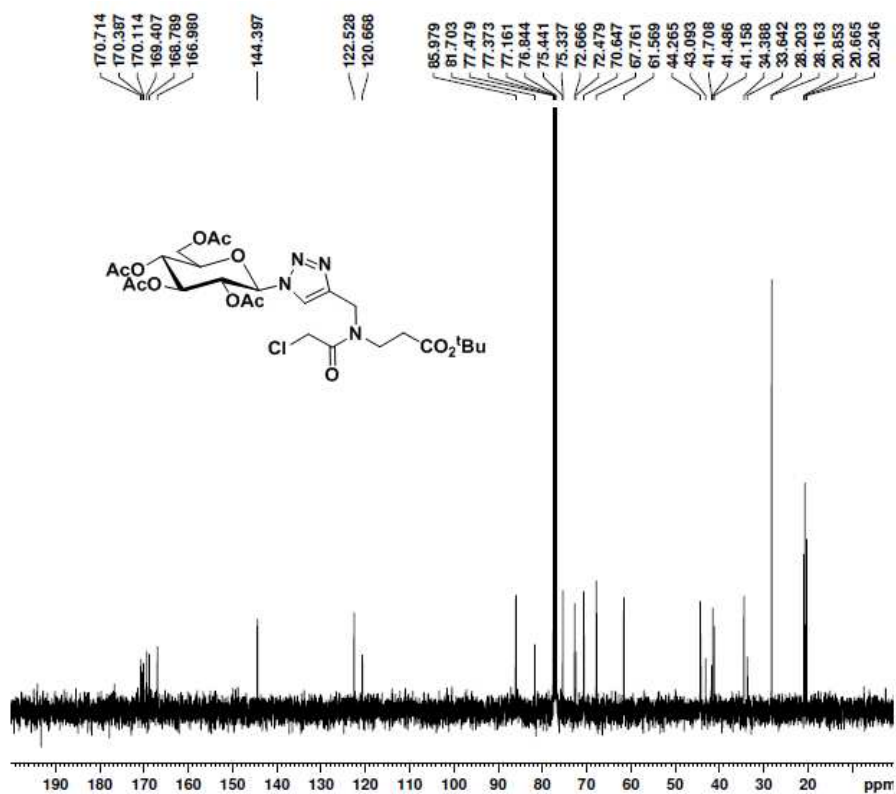

Figure S16 <sup>13</sup>C NMR (100 MHz, CDCl<sub>3</sub>) of compound 2a

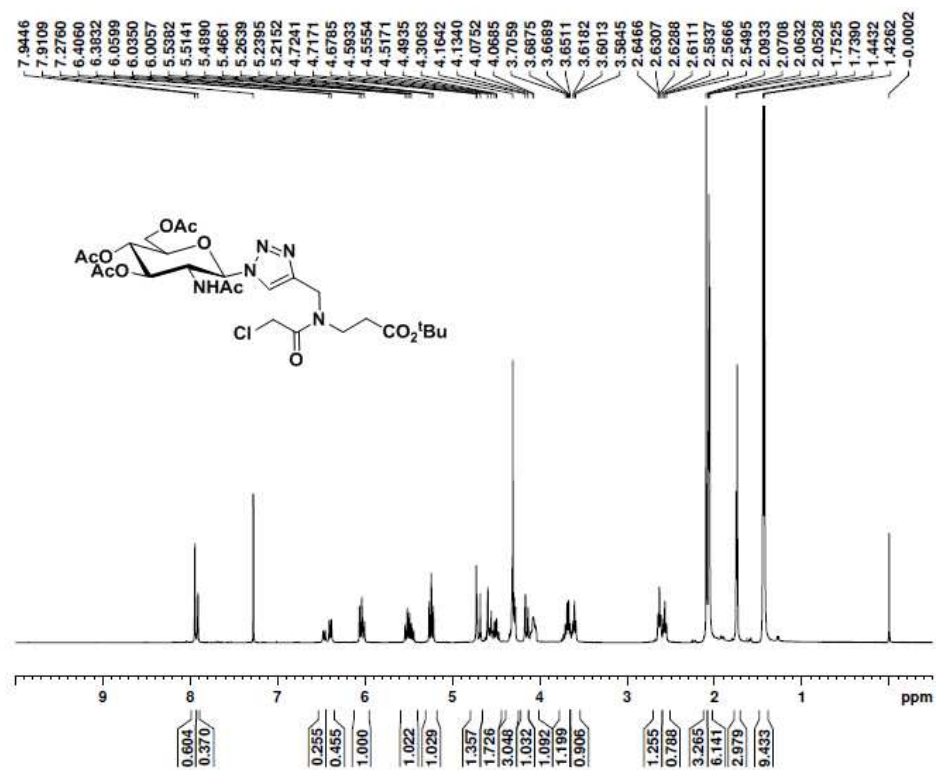

Figure S17  $^1\text{H}$  NMR (400 MHz,  $\text{CDCl}_3$ ) of compound **2b**

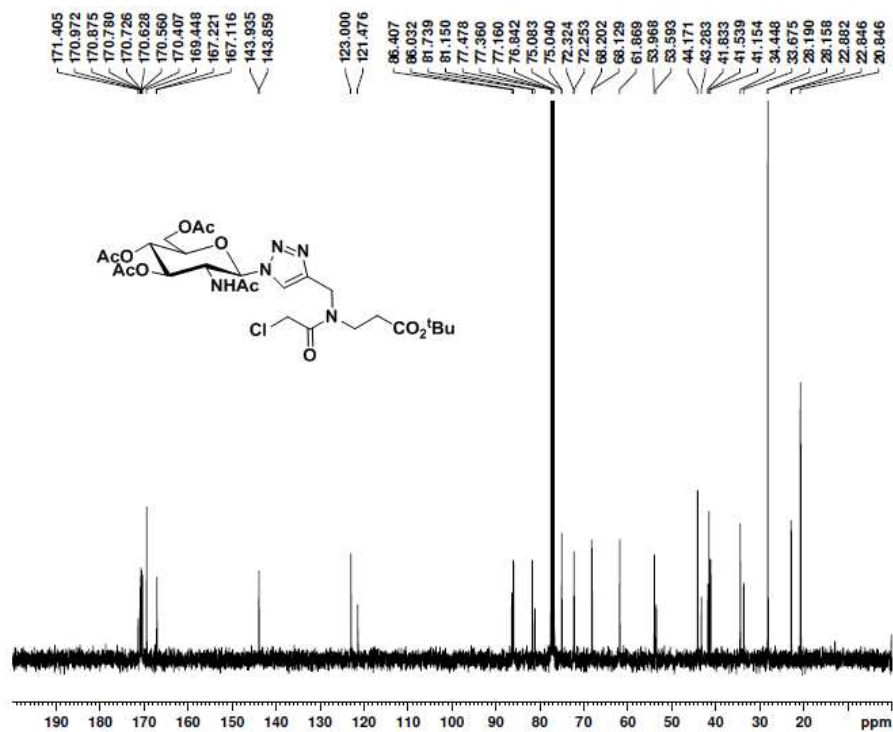

Figure S18  $^{13}\text{C}$  NMR (100 MHz,  $\text{CDCl}_3$ ) of compound **2b**

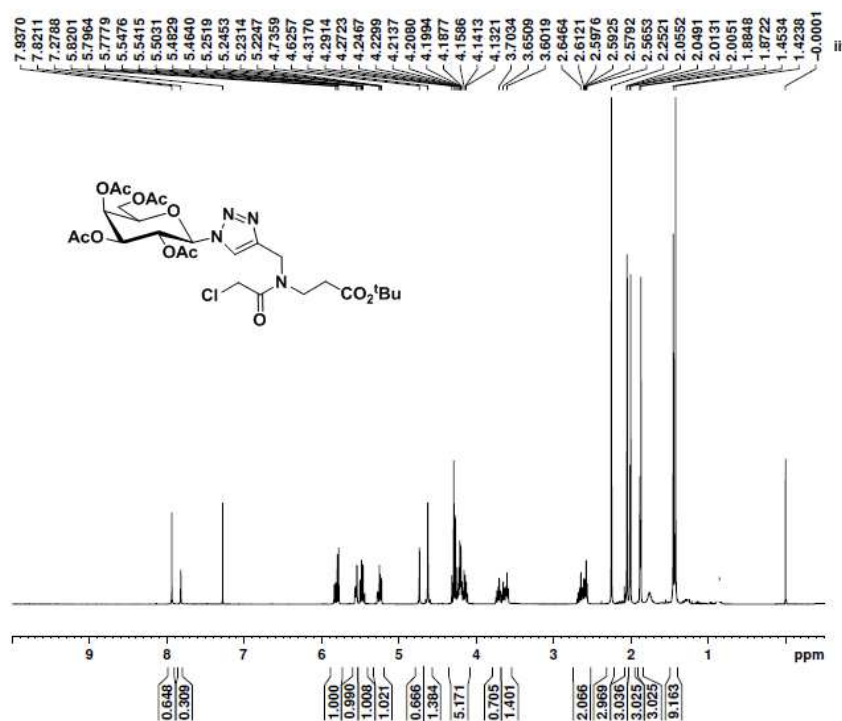

Figure S19 <sup>1</sup>H NMR (400 MHz, CDCl<sub>3</sub>) of compound 2c

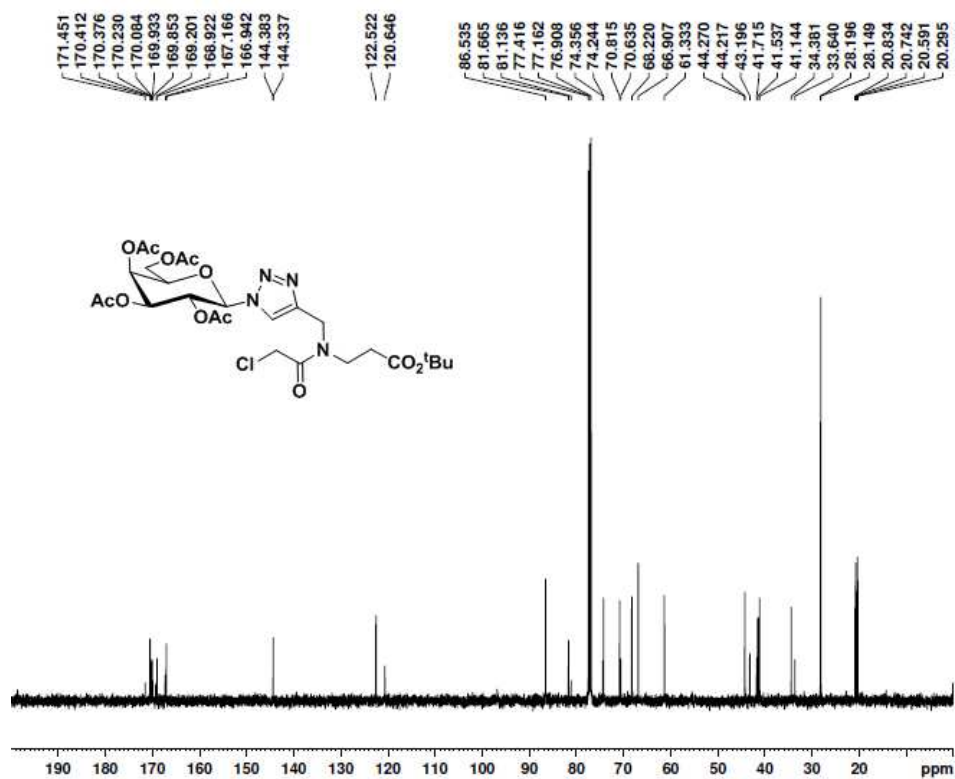

Figure S20 <sup>13</sup>C NMR (100 MHz, CDCl<sub>3</sub>) of compound 2c

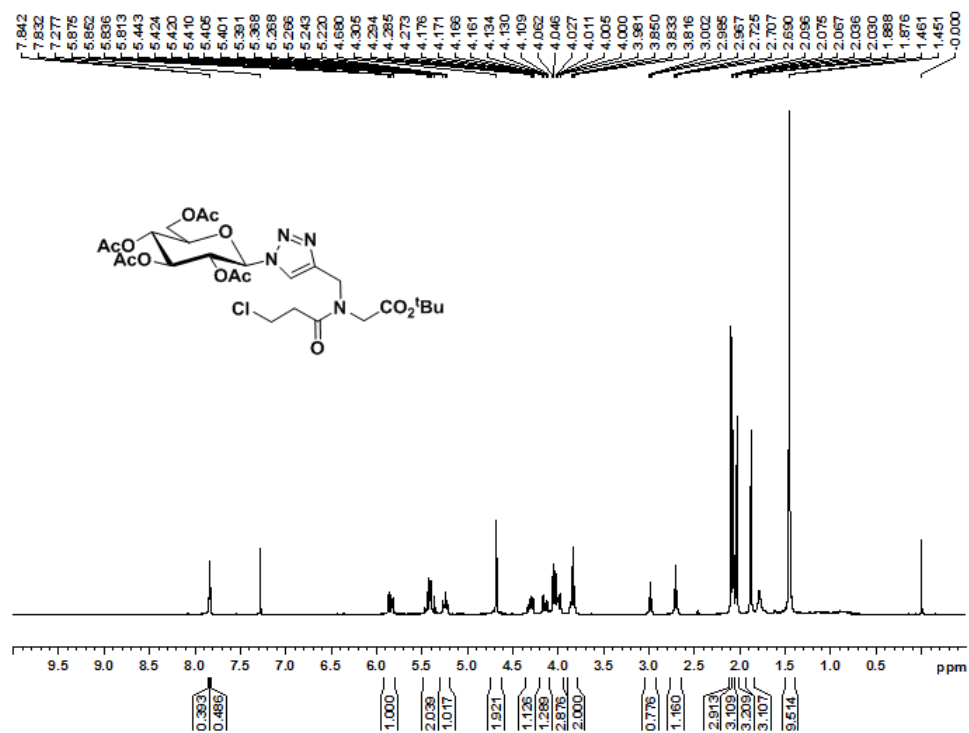

**Figure S21**  $^1\text{H}$  NMR (400 MHz,  $\text{CDCl}_3$ ) of compound **3a**

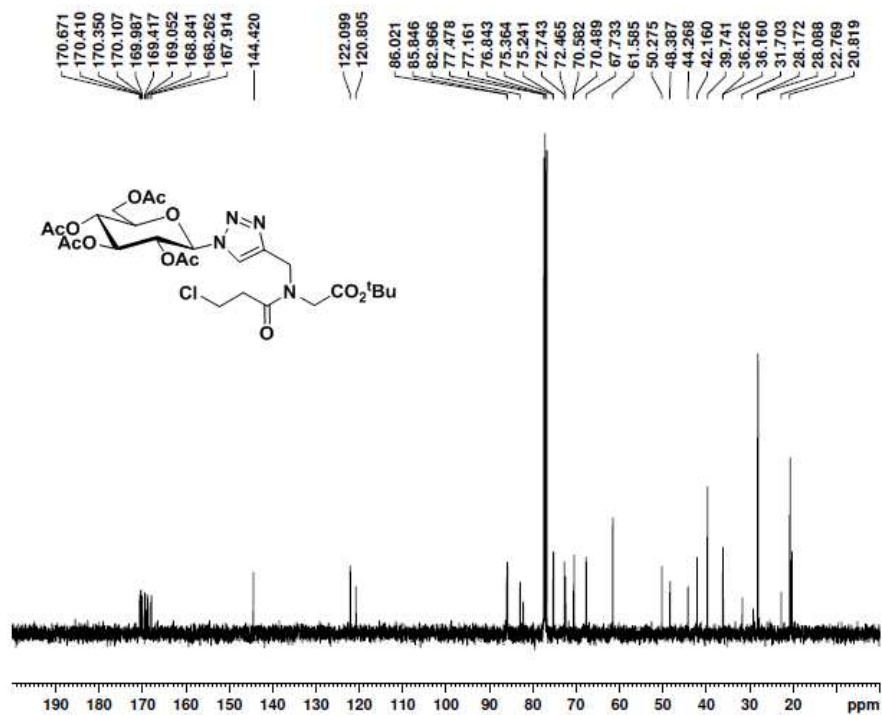

**Figure S22**  $^{13}\text{C}$  NMR (100 MHz,  $\text{CDCl}_3$ ) of compound **3a**







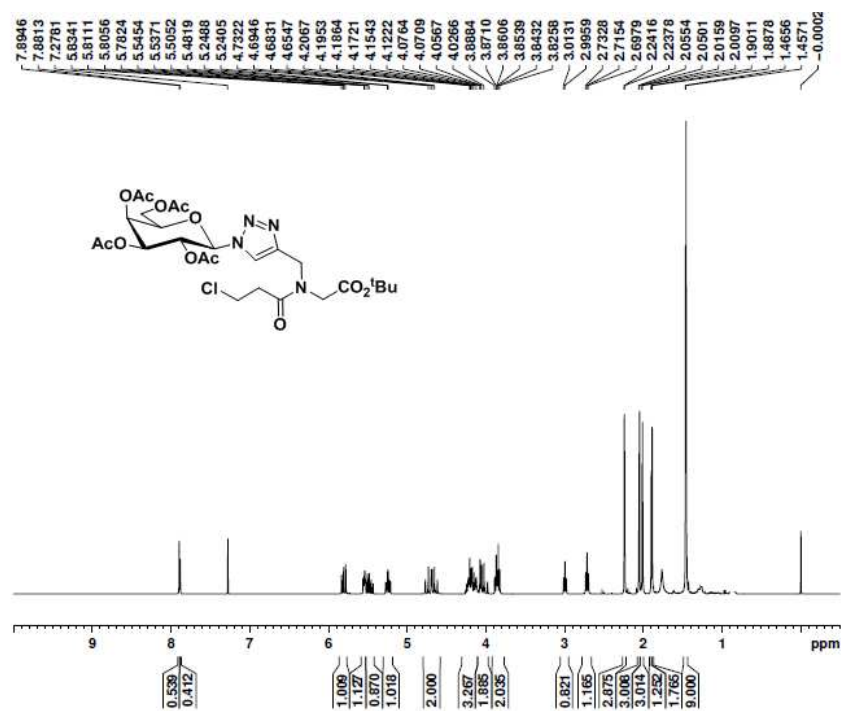

Figure S25 <sup>1</sup>H NMR (400 MHz, CDCl<sub>3</sub>) of compound 3c

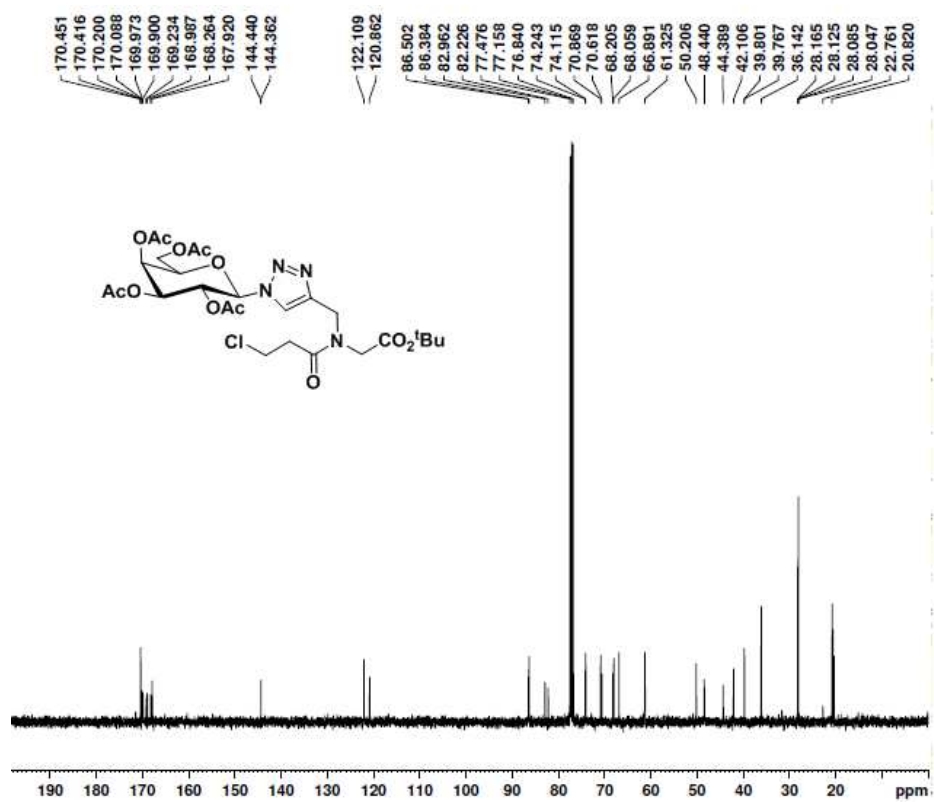

Figure S26 <sup>13</sup>C NMR (100 MHz, CDCl<sub>3</sub>) of compound 3c

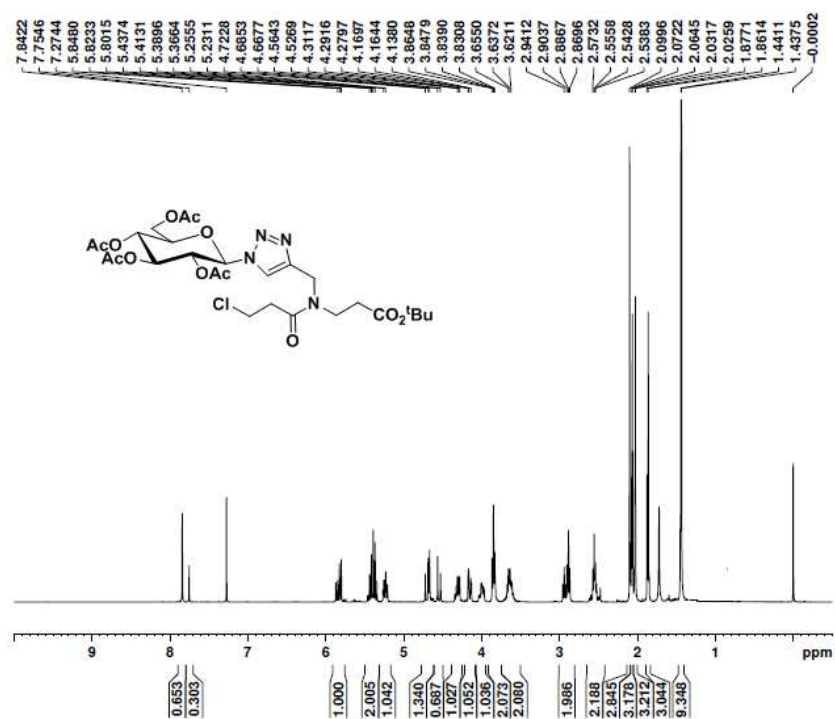

Figure S27  $^1\text{H}$  NMR (400 MHz,  $\text{CDCl}_3$ ) of compound **4a**

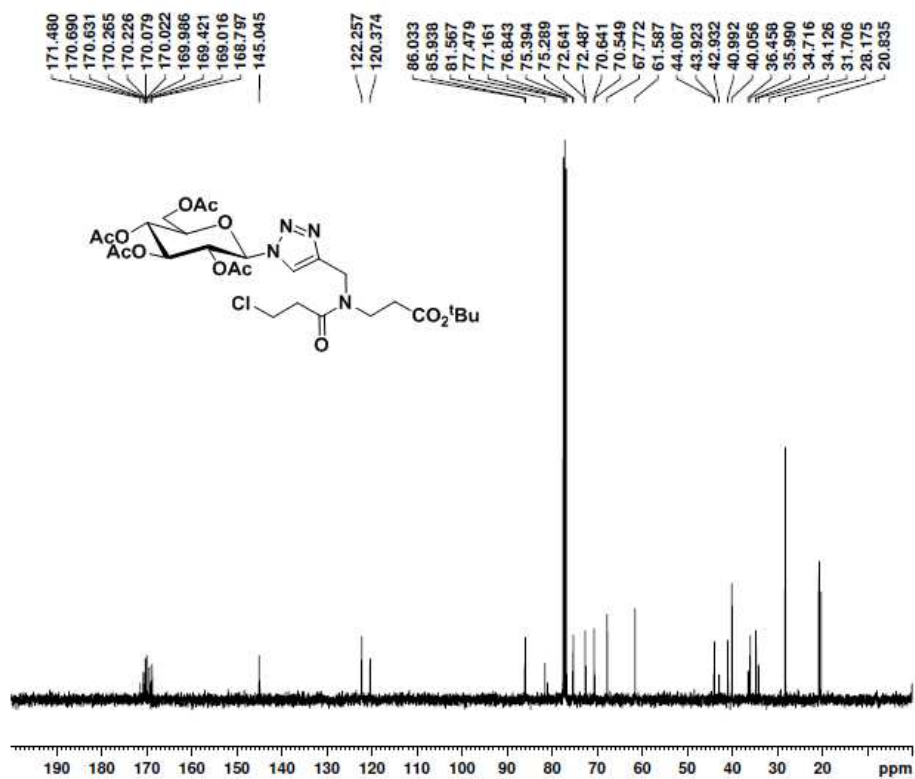

Figure S28  $^{13}\text{C}$  NMR (100 MHz,  $\text{CDCl}_3$ ) of compound **4a**

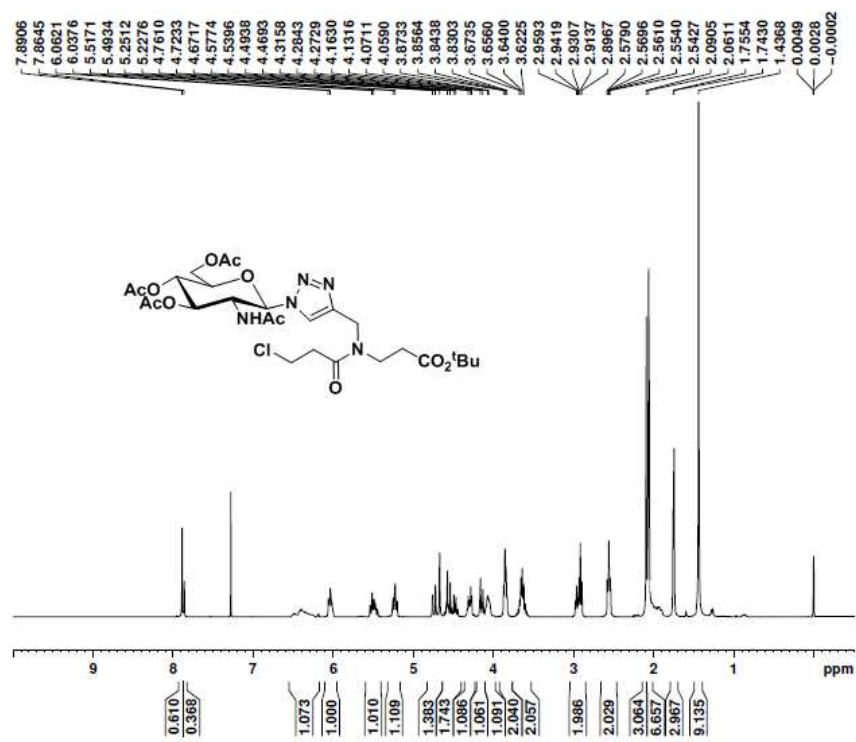

**Figure S29** <sup>1</sup>H NMR (400 MHz, CDCl<sub>3</sub>) of compound **4b**

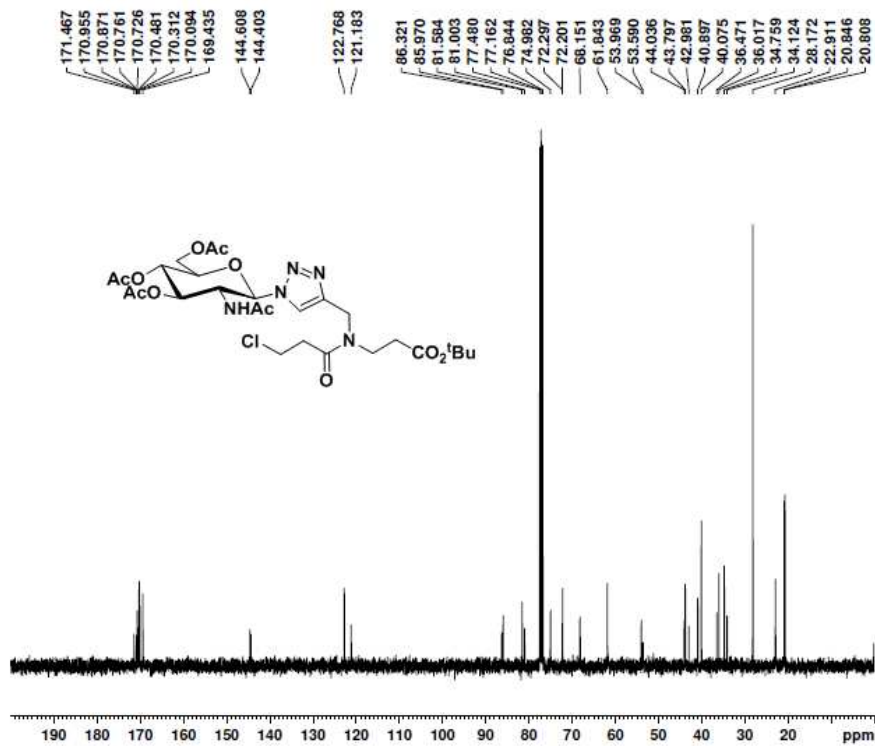

**Figure S30** <sup>13</sup>C NMR (100 MHz, CDCl<sub>3</sub>) of compound **4b**

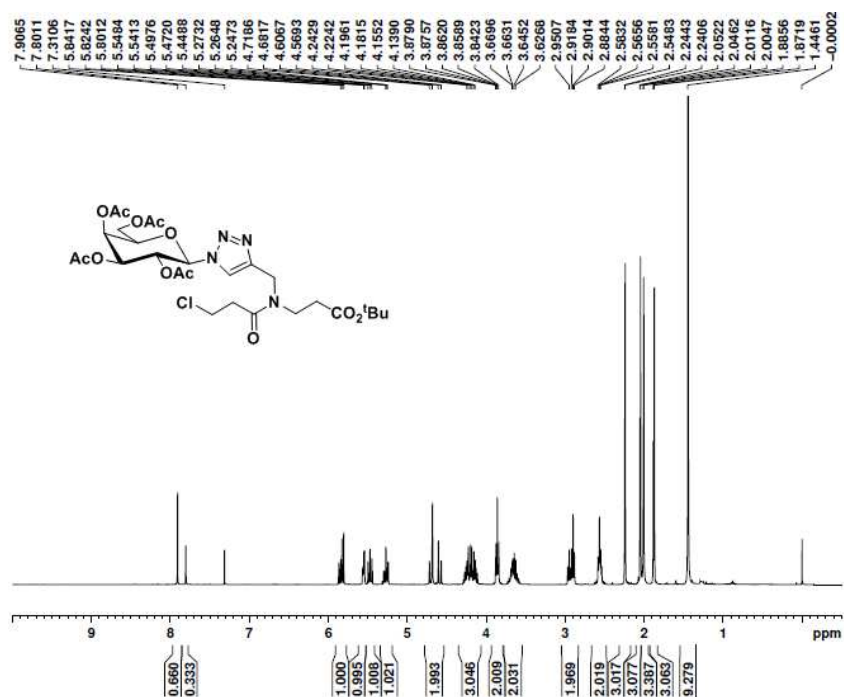

**Figure S31**  $^1\text{H}$  NMR (400 MHz,  $\text{CDCl}_3$ ) of compound **4c**

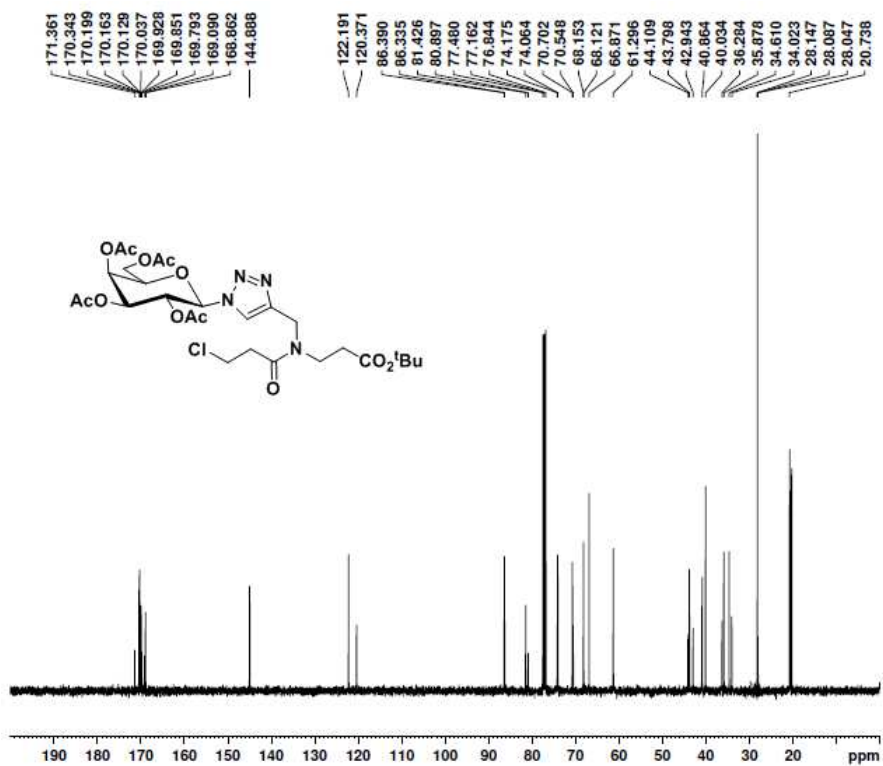

**Figure S32**  $^{13}\text{C}$  NMR (100 MHz,  $\text{CDCl}_3$ ) of compound **4c**

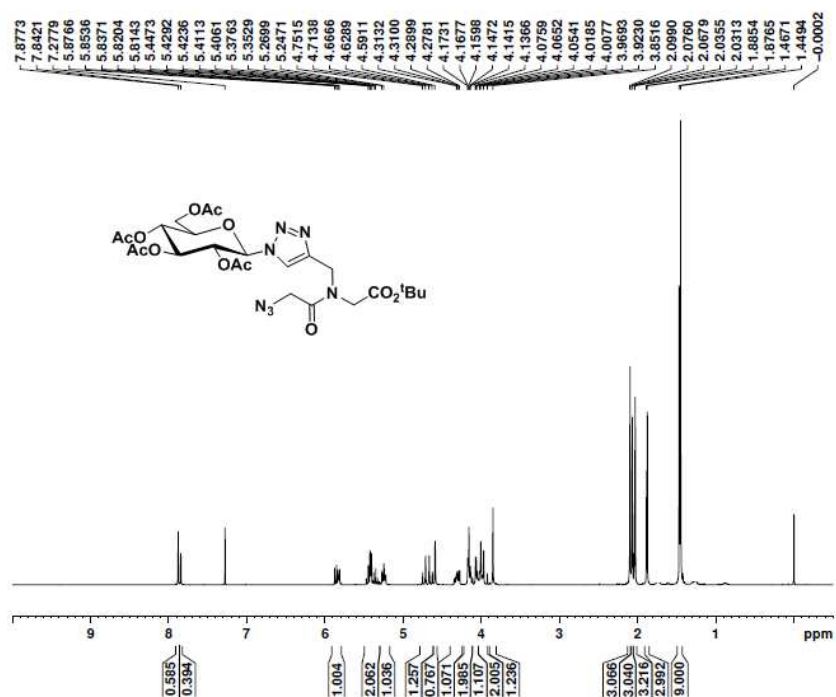

Figure S33  $^1\text{H}$  NMR (400 MHz,  $\text{CDCl}_3$ ) of compound **1d**

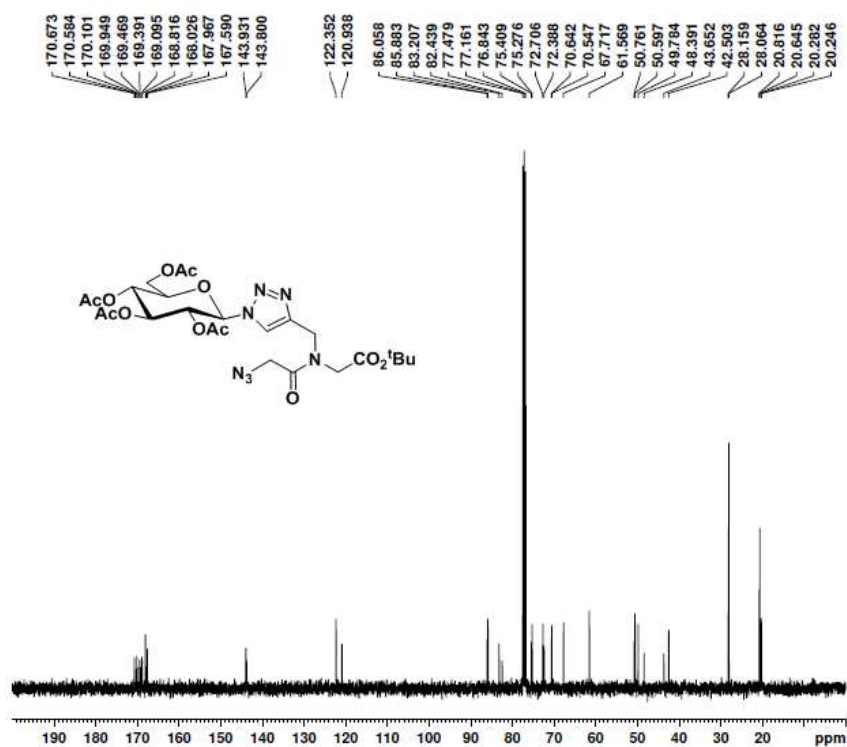

Figure S34  $^{13}\text{C}$  NMR (100 MHz,  $\text{CDCl}_3$ ) of compound **1d**

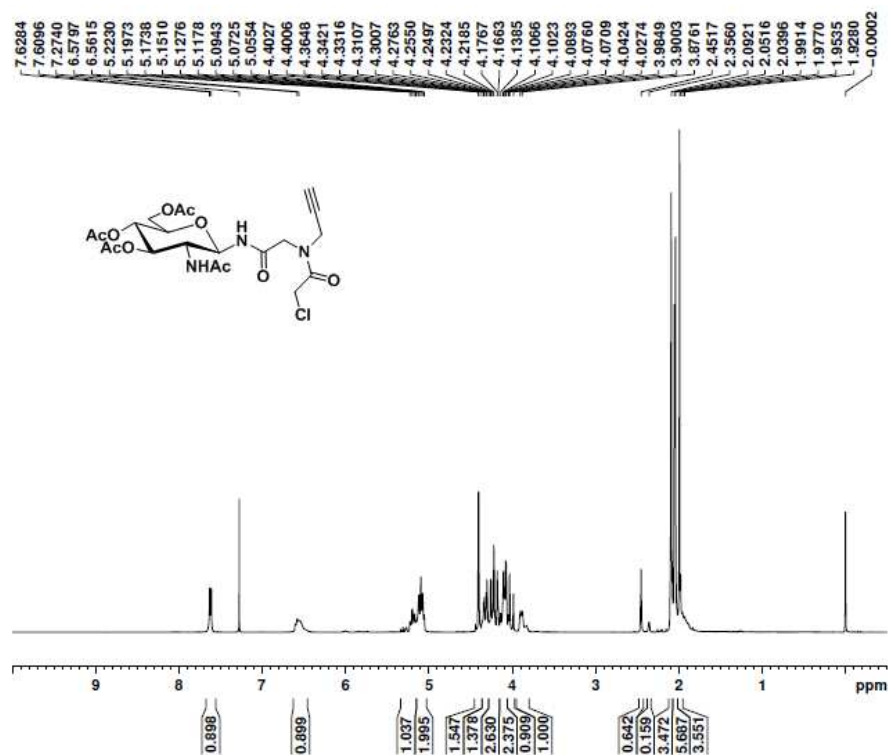

Figure S35 <sup>1</sup>H NMR (400 MHz, CDCl<sub>3</sub>) of compound 10

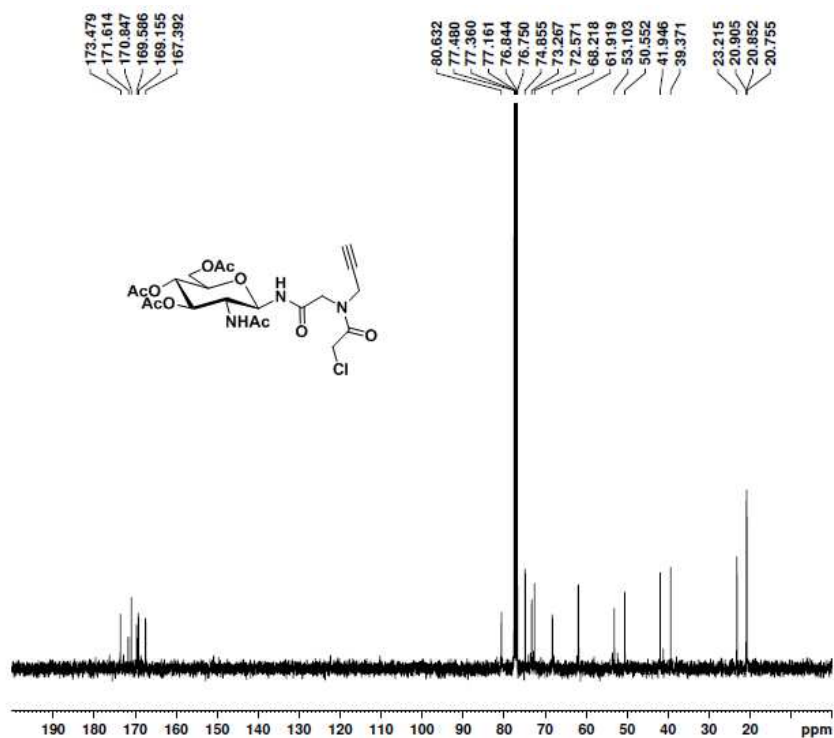

Figure S36 <sup>13</sup>C NMR (100 MHz, CDCl<sub>3</sub>) of compound 10

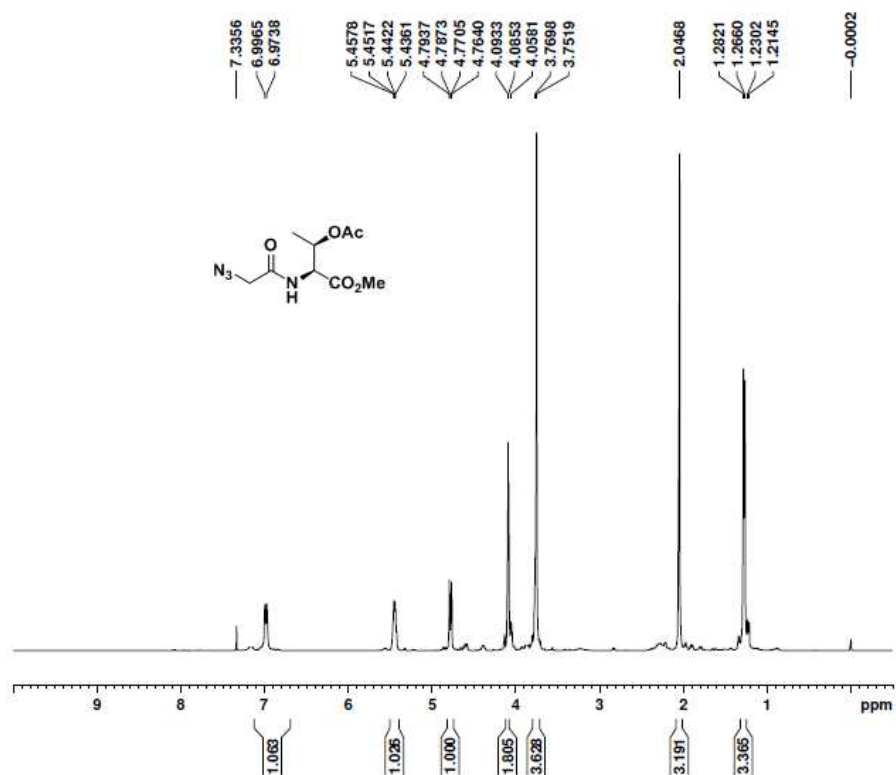

Figure S37 <sup>1</sup>H NMR (400 MHz, CDCl<sub>3</sub>) of compound 13

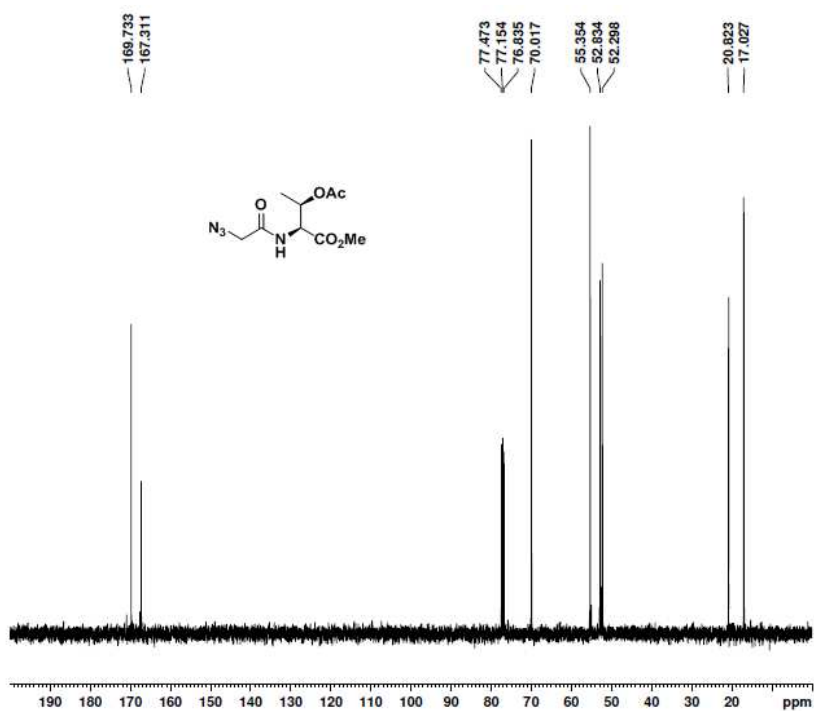

Figure S38 <sup>13</sup>C NMR (100 MHz, CDCl<sub>3</sub>) of compound 13



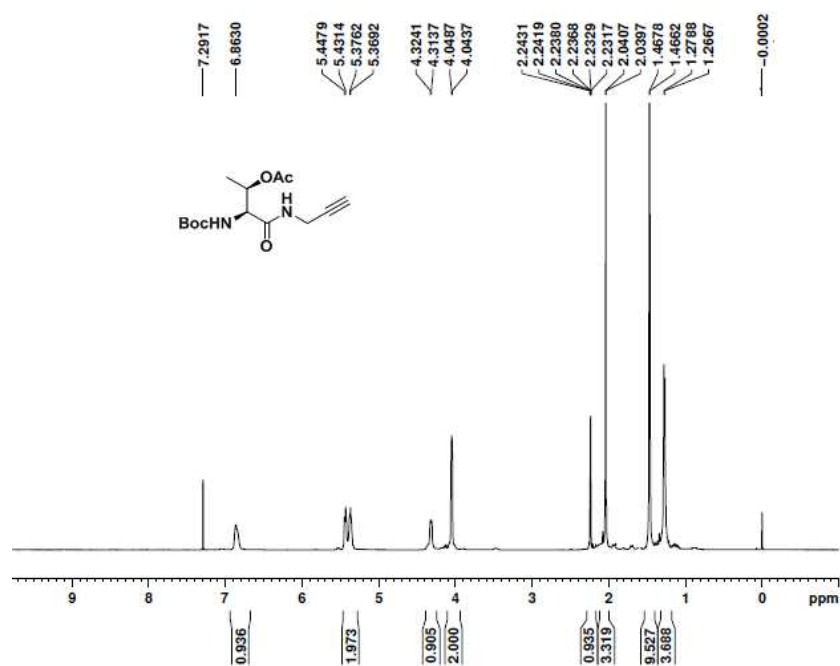

Figure S39 <sup>1</sup>H NMR (400 MHz, CDCl<sub>3</sub>) of compound 17

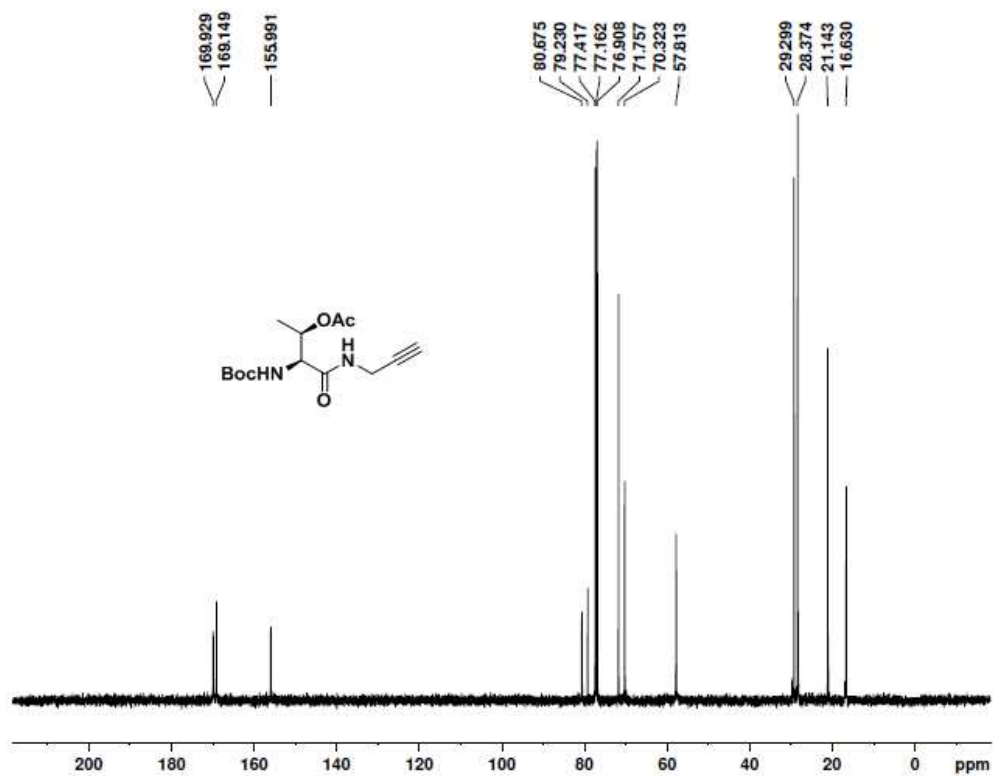

Figure S40 <sup>13</sup>C NMR (100 MHz, CDCl<sub>3</sub>) of compound 17



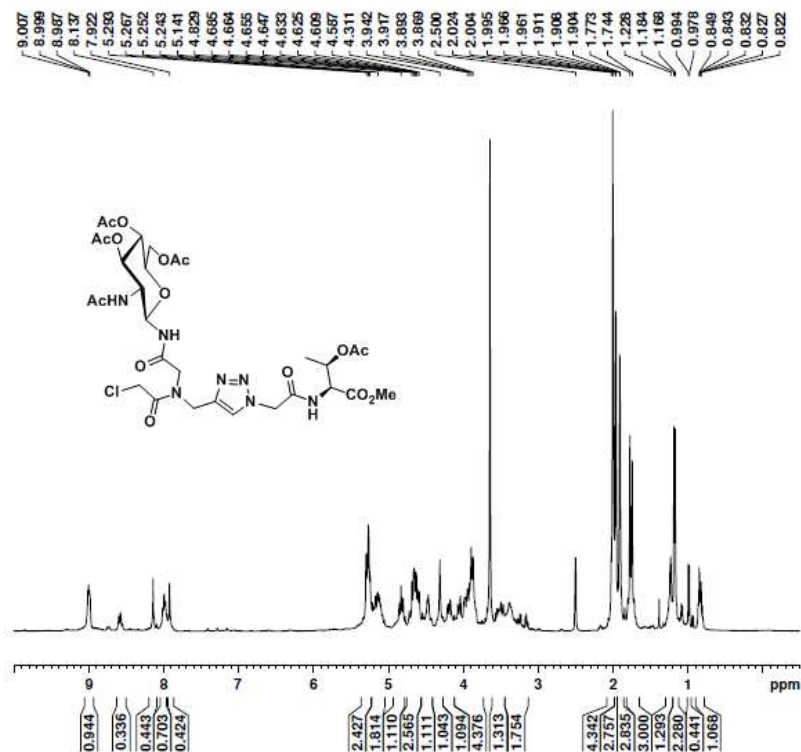

**Figure S41** <sup>1</sup>H NMR (400 MHz, DMSO-d<sub>6</sub>) of compound **14**

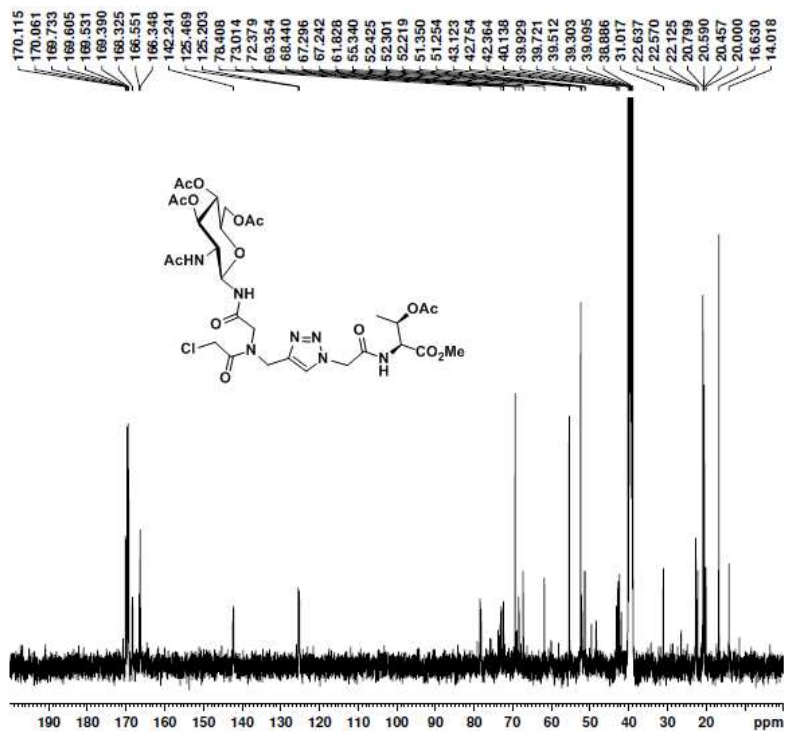

**Figure S42** <sup>13</sup>C NMR (100 MHz, DMSO-d<sub>6</sub>) of compound **14**

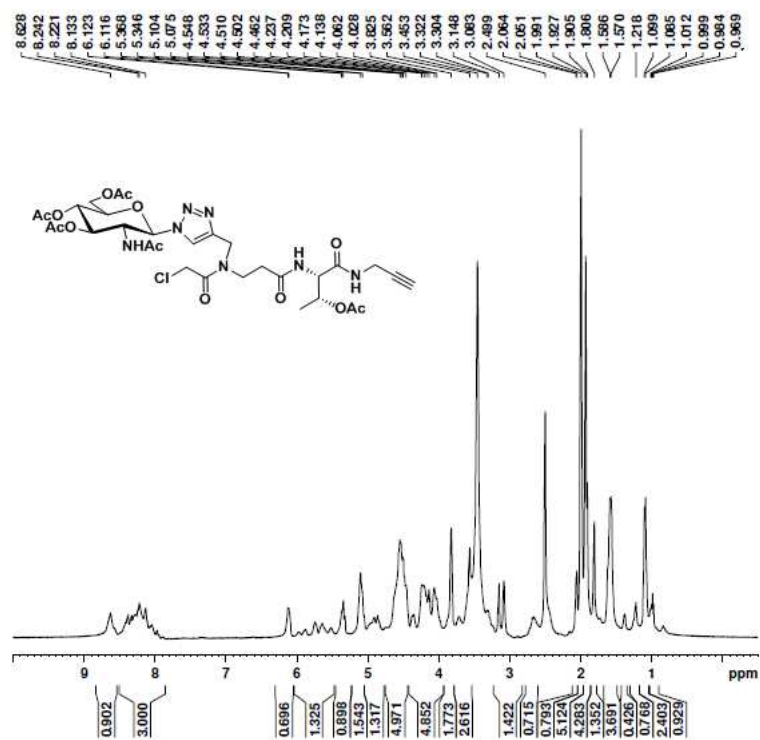

Figure S43 <sup>1</sup>H NMR (400 MHz, DMSO-d<sub>6</sub>) of compound 20

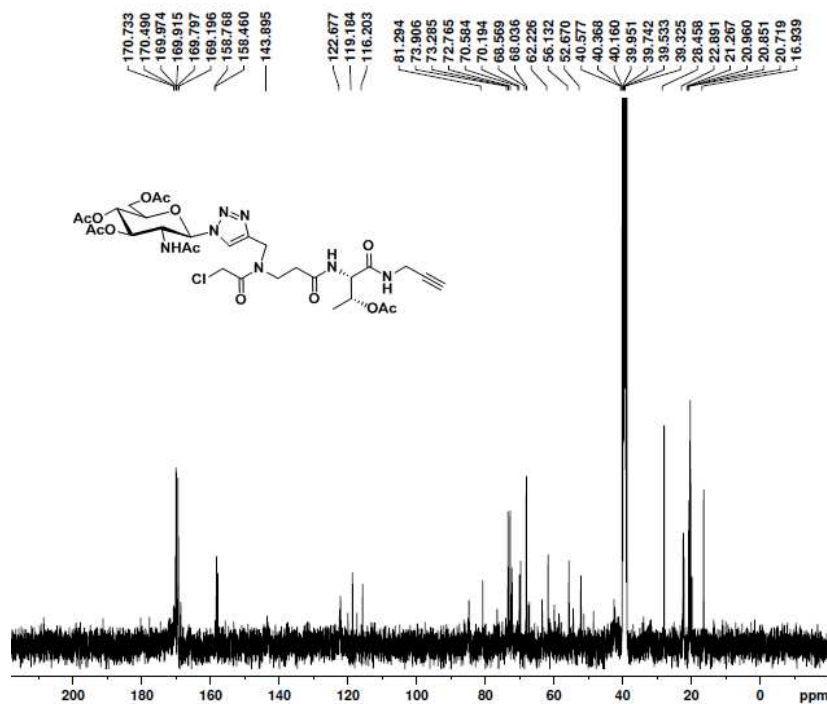

Figure S44 <sup>13</sup>C NMR (100 MHz, DMSO-d<sub>6</sub>) of compound 20
